# Supplementary material for: Hierarchical porous structure carbon nanosheets derived from sodium lignosulfonate for high-performance supercapacitors
Source: Royal Society of Chemistry journal article supplement (doi:10.1039/d0nj04907g), 2020-01-01
Supplement: d0nj04907g1.pdf [file d0nj04907g1.pdf]

## Supporting information

### **Hierarchical porous structure Carbon Nanosheets derived from Sodium Lignosulfonate for High-performance Supercapacitor**

Dichao Wu<sup>ab</sup>, Changzhou Chen<sup>ab</sup>, Jihui Li<sup>a</sup>, Xiaopeng Jian<sup>ab</sup>, Ao Wang<sup>a</sup>, Kang

Sun<sup>ab\*</sup> jianchun jiang<sup>a</sup>

*a. Institute of Chemical Industry of Forest Products, Chinese Academy of Forestry; Key Lab. of Biomass Energy and Material, Jiangsu Province; National Engineering Lab. for Biomass Chemical Utilization; Key and Open Lab. on Forest Chemical Engineering, SFA, Nanjing 210042, China*

*b. Co-Innovation Center of Efficient Processing and Utilization of Forest Resources, Nanjing Forestry University, Nanjing 210037, China*

\* Corresponding Author: E-mail: sunkang0226@163.com

Table. S1 the summary of different porous carbon nanosheets

| Raw materials                           | Template                | Specific surface area(m <sup>2</sup> /g) | Electrochemical performance | Ref. No          |
|-----------------------------------------|-------------------------|------------------------------------------|-----------------------------|------------------|
| Wasted litchi shell                     | none                    | 1122.6 m <sup>2</sup> /g                 | 222.0 F/g at 0.1 A/g        | S1               |
| Sodium gluconate                        | none                    | 1390 m <sup>2</sup> /g                   | 140F/g at 150 A/g           | S2               |
| GO                                      | Amino-functionalized-GO | 399 m <sup>2</sup> /g                    | 424F/g at 0.1 A/g           | S3               |
| coal tar pitch                          | urea                    | 1181 m <sup>2</sup> / g                  | 210 F/g at 0.1 A/g          | S4               |
| resorcinol-formaldehyde resin oligomers | Mg(OH) <sup>2</sup>     | 1520 m <sup>2</sup> / g                  | 201 F/g at 1 A/g            | S5               |
| Sodium Lignosulfonate                   | Boric acid              | 2453.91 m <sup>2</sup> /g                | 198.90 F/g at 1 A/g         | <b>This work</b> |

Table. S2 specific capacitor based on CV curves of different samples

| Scan rates (mV/S) | PCN-0                    | PCN-2  | PCN-4  | PCN-8  | PCN-10 |
|-------------------|--------------------------|--------|--------|--------|--------|
|                   | Specific capacitor (F/g) |        |        |        |        |
| 5                 | 196.35                   | 185.99 | 198.90 | 153.32 | 172.70 |
| 10                | 185.15                   | 178.66 | 192.71 | 149.49 | 164.88 |
| 20                | 170.89                   | 170.83 | 186.90 | 145.97 | 158.15 |
| 50                | 162.88                   | 166.63 | 182.13 | 140.27 | 152.31 |
| 100               | 155.80                   | 160.46 | 177.66 | 138.55 | 145.23 |

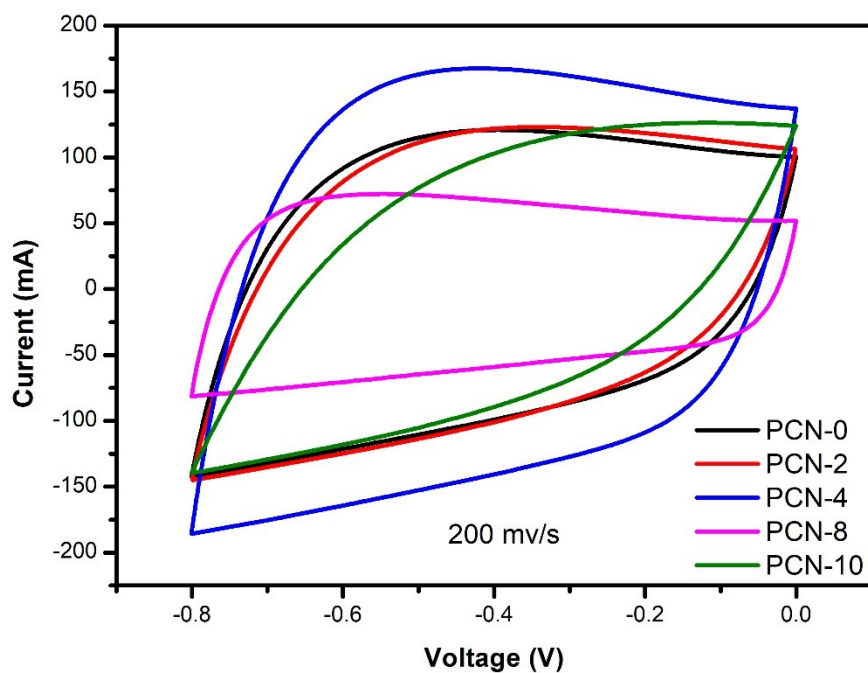

Fig. S1. CV curves of PCN-0, PCN-2, PCN-4, PCN-8 and PCN-10 under 200 mV/s

#### Reference

- [S1] H. Lu and X. S. Zhao, *Sustain. Energy Fuels*, 2017, **1**, 1265-1281.
- [S2] A. B. Fuertes, M. Sevilla, *ACS Appl. Mater. Interfaces*, 2015, **7**, 4344-4353.
- [S3] X. Zhuang, F. Zhang, D. Wu, X. Feng, *Adv. Mater*, 2014, **26**, 3081-3086
- [S4] D. H. Wang, Y. Z. Wang, Y. Chen, W. Liu, H. Q. Wang, P. H. Zhao, Y. Li, J. F. Zhang, Y. G. Dong, S. L. Hua, J. L. Yang, *Electrochimica Acta*, 2018, **283**, 132-140
- [S5] G. X. Wang, X. L. Hu, L. Liu, Y. F. Yu, H. J. Lv, A. B. Chen, *J. Mater. Sci. Mater. Electron*, 2018, **29**, 5363-5372.
